# Supplementary material for: Soil Amendments Alter Ammonia-Oxidizing Archaea and Bacteria Communities in Rain-Fed Maize Field in Semi-Arid Loess Plateau
Source: MDPI journal article supplement (doi:10.3390/land10101039), 2021-10-02
Supplement: s1 [file s1]

## Supplementary File

**Table S1.** Pearson's correlation between gene copies of the bacterial (AOB) and archaeal (AOA) amoA abundance, PNA, and soil properties.

| Soil depth | Variable | pH      | TN    | SOC   | AP    | NH <sub>4</sub> <sup>+</sup> -N | NO <sub>3</sub> <sup>-</sup> -N |
|------------|----------|---------|-------|-------|-------|---------------------------------|---------------------------------|
| 0-20 cm    | AOA      | -0.30   | 0.307 | -0.01 | 0.38  | 0.15                            | 0.15                            |
|            | AOB      | -0.71** | 0.10  | -0.26 | 0.45  | 0.02                            | 0.83**                          |
|            | PNA      | -0.62*  | 0.28  | -0.06 | 0.61* | 0.07                            | 0.71**                          |

Abbreviations: Soil pH; TN= Total Nitrogen; SOC= Soil organic carbon; NO<sub>3</sub><sup>-</sup>-N= Nitrate; NH<sub>4</sub><sup>+</sup>-N= Ammonium N; AP= Available Phosphorous. PNA indicates soil potential nitrification activity.

\* Significant correlations are indicated at P < 0.05, \*\* suggesting significant correlations at P < 0.01.

A.

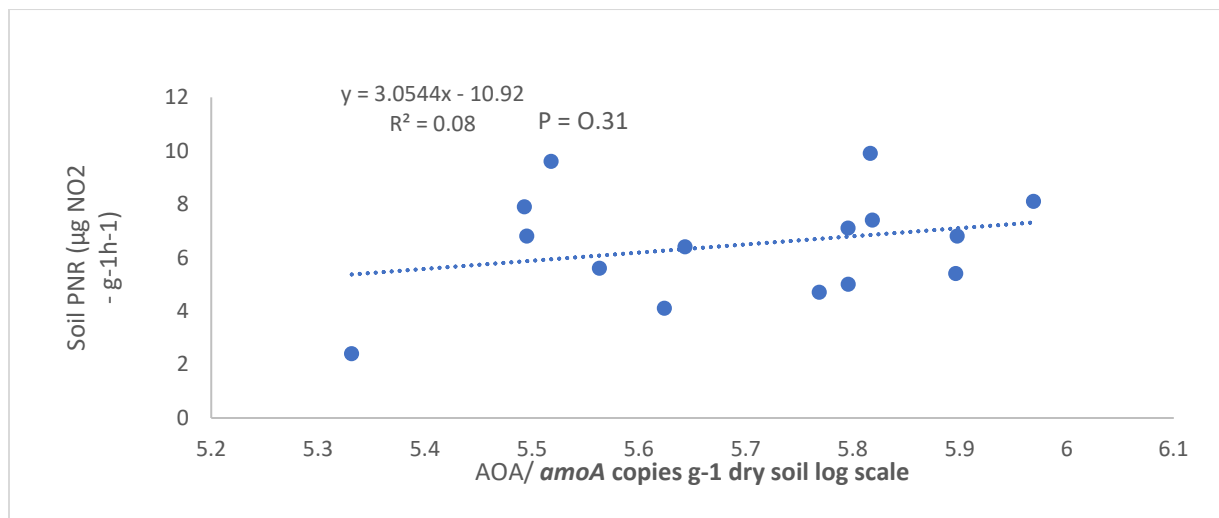

B.

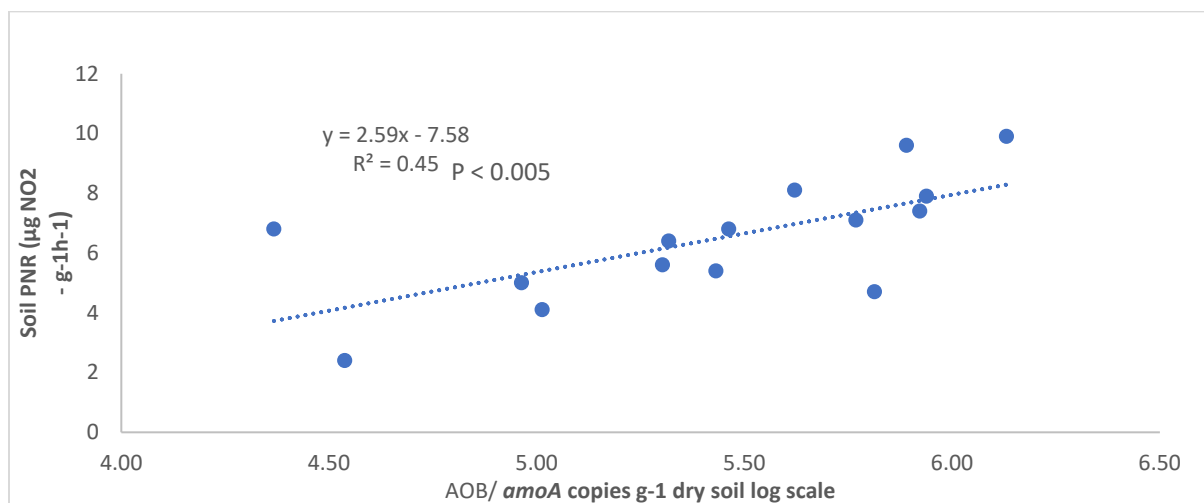

**Figure S1.** The potential nitrification rate (PNR) and the correlation between PNR and AOA(A) and AOB (B) gene copy numbers.

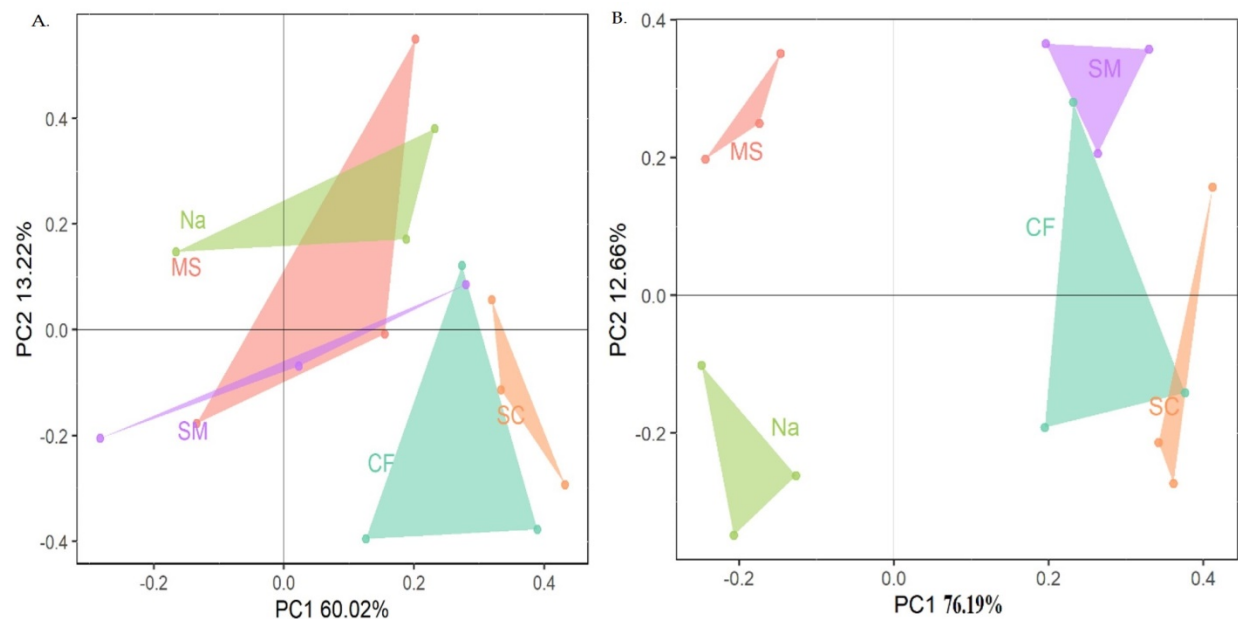

**Figure S2.** Principal component analysis as impacted by the fertilizer regime. (A). Ammonia-oxidizing archaea (*amoA* AOA gene) and (B). Ammonia-oxidizing bacteria (*amoA* AOB gene). NA= no fertilization; SM= cow manure; CF= chemical fertilizer; SC= chemical fertilizer + cow manure; MS= corn stalk.

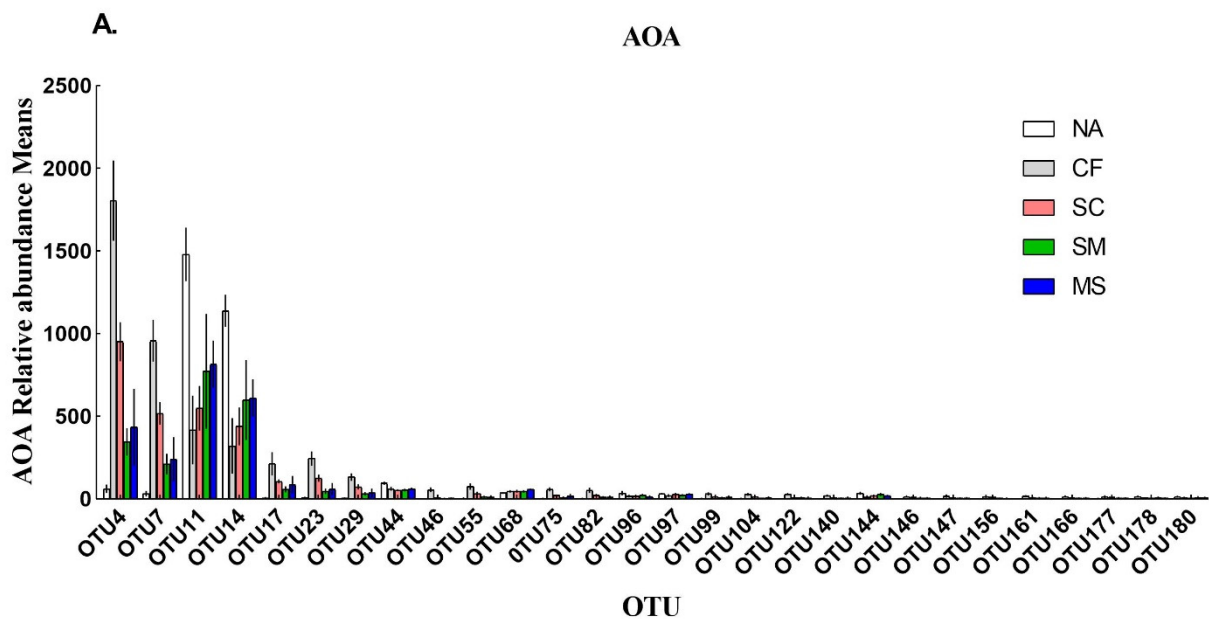

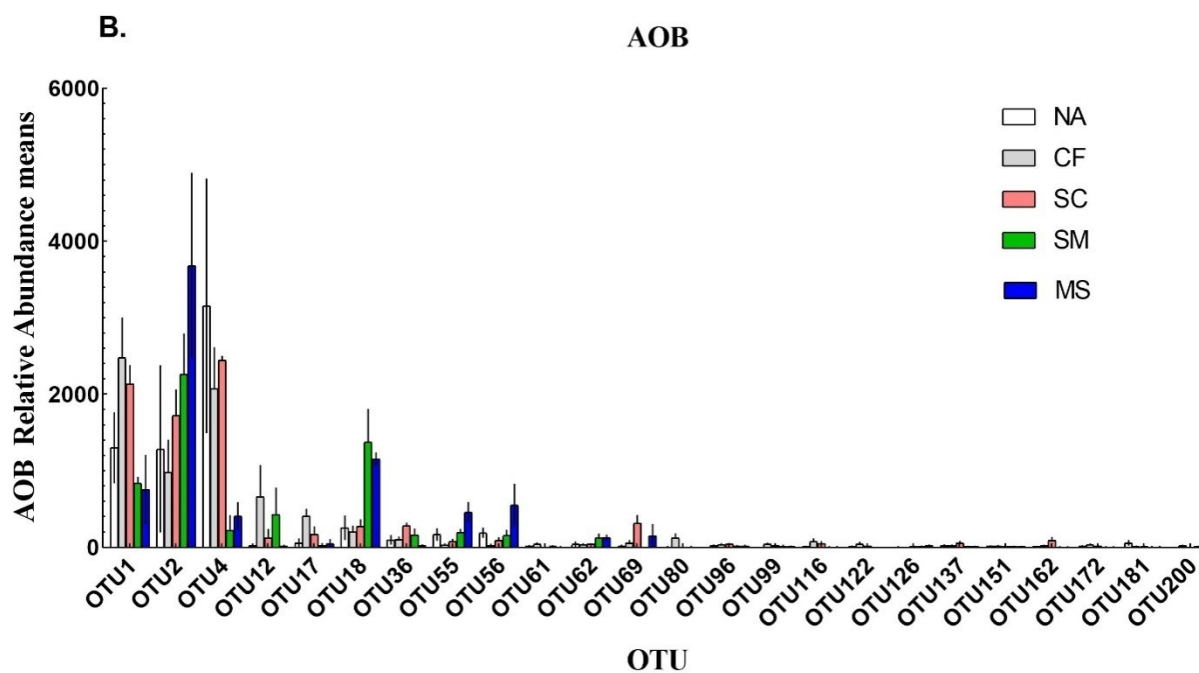

**Figure S3.** Relative abundances of selected Genus cluster of AOA (A) and AOB (B) among dominant 200 OTUs, which were significantly changed by N fertilization amendments. Error bars represent standard errors ( $n = 4$ ). Relative abundance among the N amendments within an OTU ( $P < 0.05$ ). NA= no fertilization; SM= cow manure; CF= chemical fertilizer; SC= chemical fertilizer + cow manure; MS= corn straw.
